# Supplementary material for: A Marked Low-Grade Inflammation and a Significant Deterioration in Metabolic Status in First-Episode Schizophrenia: A Five-Year Follow-Up Study
Source: MDPI journal article supplement (doi:10.3390/metabo12100983), 2022-10-17
Supplement: s1 [file s1]

## Supplementary Material

### A Marked Low-grade Inflammation and a Significant Deterioration in Metabolic Status in First Episode Schizophrenia: a Five-Year Follow-up Study

Madis Parksepp<sup>1,2\*</sup>, Liina Haring<sup>1,3,4</sup>, Kalle Kilk<sup>4</sup>, Egon Taalberg<sup>4</sup>, Raul Kangro<sup>5</sup>, Mihkel Zilmer<sup>4</sup>, Eero Vasar<sup>4</sup>

<sup>1</sup> Institute of Clinical Medicine University of Tartu; Psychiatry Clinic of Tartu University Hospital, Estonia

<sup>2</sup> Psychiatry Clinic of Viljandi Hospital, Estonia; [Madis.Parksepp@vmh.ee](mailto:Madis.Parksepp@vmh.ee) (corresponding author\*)

<sup>3</sup> Psychiatry Clinic of Tartu University Hospital, Estonia; [Liina.Haring@kliinikum.ee](mailto:Liina.Haring@kliinikum.ee)

<sup>4</sup> Institute of Biomedicine and Translational Medicine, Centre of Excellence for Genomics and Translational Medicine, University of Tartu, Estonia; [Kalle.Kilk@ut.ee](mailto:Kalle.Kilk@ut.ee); [Egon.Taalberg@ut.ee](mailto:Egon.Taalberg@ut.ee); [Mihkel.Zilmer@ut.ee](mailto:Mihkel.Zilmer@ut.ee); [Eero.Vasar@ut.ee](mailto:Eero.Vasar@ut.ee)

<sup>5</sup> Institute of Mathematics and Statistics, University of Tartu, Estonia; [Raul.Kangro@ut.ee](mailto:Raul.Kangro@ut.ee)

**Table S1.** Serum mean levels, standard deviations (SD), and range of inflammatory and metabolic protein biomarkers (pg/ml), acylcarnitines, hexoses, body mass index, and waist circumference for control subjects (CSs, n = 58), first-episode psychosis (FEP) patients at baseline (before treatment with antipsychotics, FEP<sub>b</sub>, n = 54), after 0.6-year treatment (FEP<sub>0.6-year</sub>, n = 47), and after 5.1-year treatment (FEP<sub>5.1-year</sub>, n = 38) with antipsychotics. In comparison between reduced and unrestricted models, *p*-values have been multiple tests corrected according to the false discovery rate (FDR) method. The unrestricted regression model is designated as True (i.e. more complex set of predictor variables explained more effectively biomarker level alterations over time) or False (i.e. unrestricted model did not provide more explanatory power than a simple one).

|                                                                                      |                                                                                                                                          |
|--------------------------------------------------------------------------------------|------------------------------------------------------------------------------------------------------------------------------------------|
| Regression equations for estimating biomarker level or biomarkers ratio alterations. |                                                                                                                                          |
| Reduced model                                                                        | $\log(\text{biomarker}) \sim \text{Age} + \text{Gender} + \text{Smoking} + (1   \text{Patient})$                                         |
| Unrestricted model                                                                   | $\log(\text{biomarker}) \sim \text{Age} + \text{Gender} + \text{Smoking} + \text{Visit} + \text{Time difference} + (1   \text{Patient})$ |

Visit = biomarker measurements at three-time points in the patients' group, Time1 = time difference between FEP<sub>b</sub> and FEP<sub>0.6-year</sub>, Time2 = time difference between FEP<sub>0.6-year</sub> and FEP<sub>5.1-year</sub>, (1|Patient) = random effects of patients.

|                                                   | CSs<br>Mean ± SD<br>Median (range) | FEP <sub>b</sub><br>Mean ± SD<br>Median (range) | FEP <sub>(0.6-year)</sub><br>Mean ± SD<br>Median (range) | FEP <sub>(5.1-year)</sub><br>Mean ± SD<br>Median (range) | Comparison between models   |                          |
|---------------------------------------------------|------------------------------------|-------------------------------------------------|----------------------------------------------------------|----------------------------------------------------------|-----------------------------|--------------------------|
|                                                   |                                    |                                                 |                                                          |                                                          | Adjusted<br><i>p</i> -value | True (T) or<br>false (F) |
| <i>Body mass index (BMI), waist circumference</i> |                                    |                                                 |                                                          |                                                          |                             |                          |
| BMI                                               | 22.6 ± 2.78<br>22.6 (16.8 – 28.9)  | 22.8 ± 3.00<br>22.2 (18.4 – 30.2)               | 25.3 ± 3.94<br>24.4 (18.8 – 34.7)                        | 27.8 ± 4.71<br>27.5 (18.8 – 43.0)                        | 6 × 10 <sup>-12</sup>       | T                        |
| Waist circumference                               | 77.9 ± 12.6<br>77.0 (61.0 – 108)   | 81.0 ± 9.89<br>79.5 (64.0 – 110)                | 86.3 ± 11.2<br>86.0 (68.0 – 114)                         | 94.4 ± 11.2<br>96.5 (65.0 – 118)                         | 6 × 10 <sup>-11</sup>       | T                        |

*Continued.*

|                                               | CSs                                | FEP <sub>b</sub>                   | FEP <sup>(0.6-year)</sup>          | FEP <sup>(5.1-year)</sup>          | Comparison between models   |                          |
|-----------------------------------------------|------------------------------------|------------------------------------|------------------------------------|------------------------------------|-----------------------------|--------------------------|
|                                               | Mean ± SD<br>Median (range)        | Adjusted<br><i>p</i> -value | True (T) or<br>false (F) |
| <b>Inflammatory biomarkers</b>                |                                    |                                    |                                    |                                    |                             |                          |
| Interleukin (IL-)2                            | 2.27 ± 1.26<br>2.50 (0.66 – 6.28)  | 3.15 ± 0.87<br>3.06 (1.18 – 6.69)  | 2.39 ± 1.14<br>2.10 (1.14 – 7.90)  | 3.52 ± 1.33<br>3.60 (0.72 – 8.27)  | 5 × 10 <sup>-7</sup>        | T                        |
| IL-4                                          | 1.33 ± 0.51<br>1.26 (0.79 – 3.71)  | 1.87 ± 0.57<br>1.79 (1.02 – 3.75)  | 1.62 ± 0.63<br>1.41 (0.92 – 4.32)  | 2.21 ± 0.56<br>2.24 (0.82 – 3.47)  | 3 × 10 <sup>-9</sup>        | T                        |
| IL-6                                          | 0.76 ± 0.59<br>0.59 (0.15 – 2.91)  | 1.27 ± 1.14<br>0.87 (0.33 – 5.03)  | 0.93 ± 0.76<br>0.72 (0.19 – 4.16)  | 1.12 ± 0.74<br>0.90 (0.52 – 4.45)  | 6 × 10 <sup>-4</sup>        | T                        |
| IL-8                                          | 5.98 ± 2.90<br>5.61 (1.61 – 13.8)  | 6.58 ± 4.07<br>5.59 (1.72 – 17.9)  | 5.66 ± 3.88<br>4.30 (1.25 – 17.4)  | 7.05 ± 3.05<br>6.59 (2.63 – 14.1)  | 4 × 10 <sup>-4</sup>        | T                        |
| IL-10                                         | 0.71 ± 0.42<br>0.59 (0.19 – 2.11)  | 0.73 ± 0.37<br>0.73 (0.19 – 1.65)  | 0.75 ± 0.49<br>0.65 (0.27 – 2.29)  | 1.44 ± 0.93<br>1.13 (0.50 – 4.94)  | 4 × 10 <sup>-7</sup>        | T                        |
| IL-1α                                         | 0.19 ± 0.13<br>0.14 (0.060 – 0.61) | 0.29 ± 0.23<br>0.23 (0.060 – 1.33) | 0.23 ± 0.19<br>0.17 (0.07 – 1.26)  | 0.30 ± 0.11<br>0.31 (0.060 – 0.58) | 2 × 10 <sup>-4</sup>        | T                        |
| IL-1β                                         | 1.63 ± 0.91<br>1.48 (0.45 – 4.47)  | 1.41 ± 0.66<br>1.37 (0.44 – 3.44)  | 1.37 ± 0.76<br>1.39 (0.39 – 3.39)  | 1.60 ± 0.47<br>1.66 (0.46 – 2.23)  | 1 × 10 <sup>-1</sup>        | F                        |
| Interferon gamma (IFN-γ)                      | 0.30 ± 0.090<br>0.27 (0.19 – 0.55) | 0.36 ± 0.14<br>0.36 (0.19 – 0.92)  | 0.27 ± 0.12<br>0.22 (0.17 – 0.69)  | 0.44 ± 0.21<br>0.38 (0.16 – 1.14)  | 3 × 10 <sup>-8</sup>        | T                        |
| Tumor necrosis factor<br>alpha (TNF-α)        | 2.22 ± 1.40<br>1.86 (0.86 – 8.70)  | 1.98 ± 0.84<br>1.83 (0.97 – 5.76)  | 1.91 ± 0.59<br>1.79 (1.03 – 3.59)  | 2.39 ± 0.79<br>2.32 (0.90 – 4.61)  | 3 × 10 <sup>-3</sup>        | T                        |
| Monocyte chemoattractant<br>protein-1 (MCP-1) | 131 ± 76.7<br>115 (23.1 – 365)     | 127 ± 77.4<br>111 (21.2 – 381)     | 135 ± 80.2<br>116 (10.6 – 344)     | 170 ± 72.1<br>159 (36.5 – 353)     | 4 × 10 <sup>-3</sup>        | T                        |
| Ferritin                                      | 43.6 ± 55.2<br>21.4 (1.22 – 255)   | 90.0 ± 82.5<br>62.0 (4.26 – 386)   | 64.3 ± 75.8<br>32.5 (5.09 – 342)   | 92.7 ± 77.8<br>77.4 (3.35 – 269)   | 3 × 10 <sup>-3</sup>        | T                        |
| <b>Metabolic biomarkers</b>                   |                                    |                                    |                                    |                                    |                             |                          |
| Resistin                                      | 2.53 ± 0.57<br>2.51 (0.88 – 4.10)  | 3.15 ± 1.33<br>2.85 (0.75 – 8.58)  | 2.78 ± 0.88<br>2.73 (1.42 – 5.63)  | 2.18 ± 1.01<br>1.90 (1.13 – 6.40)  | 1 × 10 <sup>-4</sup>        | T                        |
| Insulin                                       | 15.6 ± 14.3<br>9.02 (1.80 – 67.6)  | 12.9 ± 14.8<br>7.24 (1.54 – 64.4)  | 18.3 ± 16.0<br>12.3 (2.41 – 66.8)  | 8.28 ± 6.59<br>7.30 (1.90 – 35.6)  | 2 × 10 <sup>-2</sup>        | F                        |
| Leptin                                        | 2.07 ± 2.18<br>1.34 (0.38 – 12.8)  | 1.40 ± 1.69<br>0.87 (0.000 – 10.4) | 2.59 ± 2.77<br>1.31 (0.000 – 12.5) | 3.29 ± 3.90<br>1.39 (0.45 – 15.5)  | 1 × 10 <sup>-4</sup>        | T                        |
| Plasminogen activator<br>inhibitor-1 (PAI-1)  | 21.9 ± 9.56<br>20.5 (6.33 – 49.9)  | 29.7 ± 13.6<br>26.5 (2.13 – 61.7)  | 25.8 ± 14.9<br>20.9 (4.81 – 73.0)  | 20.4 ± 12.8<br>18.1 (0.95 – 63.2)  | 2 × 10 <sup>-4</sup>        | T                        |

*Continued.*

|                       | CSs<br>Mean ± SD<br>Median (range)     | FEP <sub>b</sub><br>Mean ± SD<br>Median (range) | FEP <sub>(0.6-year)</sub><br>Mean ± SD<br>Median (range) | FEP <sub>(5.1-year)</sub><br>Mean ± SD<br>Median (range) | Comparison between models   |                          |
|-----------------------|----------------------------------------|-------------------------------------------------|----------------------------------------------------------|----------------------------------------------------------|-----------------------------|--------------------------|
|                       |                                        |                                                 |                                                          |                                                          | Adjusted<br><i>p</i> -value | True (T) or<br>false (F) |
| <i>Acylcarnitines</i> |                                        |                                                 |                                                          |                                                          |                             |                          |
| C0                    | 32.0 ± 7.82<br>31.8 (16.6 – 51.8)      | 34.6 ± 7.40<br>34.4 (18.3 – 52.0)               | 34.0 ± 9.63<br>33.4 (15.8 – 58.4)                        | 37.1 ± 10.3<br>34.2 (18.7 – 67.2)                        | 8 × 10 <sup>-1</sup>        | F                        |
| C16                   | 0.082 ± 0.021<br>0.080 (0.035 – 0.13)  | 0.11 ± 0.032<br>0.11 (0.046 – 0.20)             | 0.092 ± 0.029<br>0.085 (0.041 – 0.20)                    | 0.11 ± 0.040<br>0.10 (0.057 – 0.22)                      | 1 × 10 <sup>-5</sup>        | T                        |
| C16-OH                | 0.009 ± 0.013<br>0.009 (0.000 – 0.084) | 0.017 ± 0.005<br>0.016 (0.009 – 0.027)          | 0.019 ± 0.028<br>0.015 (0.008 – 0.20)                    | 0.053 ± 0.099<br>0.022 (0.000 – 0.50)                    | 3 × 10 <sup>-2</sup>        | F                        |
| C16:1                 | 0.026 ± 0.008<br>0.025 (0.015 – 0.071) | 0.036 ± 0.012<br>0.036 (0.015 – 0.064)          | 0.028 ± 0.012<br>0.023 (0.011 – 0.062)                   | 0.039 ± 0.022<br>0.032 (0.018 – 0.11)                    | 4 × 10 <sup>-5</sup>        | T                        |
| C16:1-OH              | 0.007 ± 0.013<br>0.008 (0.000 – 0.10)  | 0.014 ± 0.004<br>0.013 (0.007 – 0.028)          | 0.014 ± 0.012<br>0.011 (0.006 – 0.092)                   | 0.034 ± 0.054<br>0.018 (0.000 – 0.24)                    | 1 × 10 <sup>-2</sup>        | F                        |
| C16:2                 | 0.014 ± 0.007<br>0.012 (0.008 – 0.048) | 0.015 ± 0.004<br>0.014 (0.008 – 0.027)          | 0.013 ± 0.005<br>0.013 (0.006 – 0.027)                   | 0.026 ± 0.025<br>0.019 (0.008 – 0.11)                    | 2 × 10 <sup>-5</sup>        | T                        |
| C16:2-OH              | 0.016 ± 0.015<br>0.021 (0.000 – 0.045) | 0.027 ± 0.005<br>0.027 (0.018 – 0.038)          | 0.029 ± 0.009<br>0.028 (0.019 – 0.075)                   | 0.027 ± 0.018<br>0.024 (0.000 – 0.085)                   | 2 × 10 <sup>-3</sup>        | T                        |
| C18:0                 | 0.039 ± 0.009<br>0.038 (0.022 – 0.073) | 0.046 ± 0.013<br>0.046 (0.025 – 0.085)          | 0.042 ± 0.013<br>0.040 (0.022 – 0.074)                   | 0.052 ± 0.021<br>0.043 (0.026 – 0.12)                    | 3 × 10 <sup>-3</sup>        | T                        |
| C18:1                 | 0.096 ± 0.030<br>0.092 (0.058 – 0.18)  | 0.14 ± 0.046<br>0.14 (0.049 – 0.27)             | 0.096 ± 0.041<br>0.086 (0.039 – 0.27)                    | 0.14 ± 0.048<br>0.13 (0.072 – 0.27)                      | 8 × 10 <sup>-8</sup>        | T                        |
| C18:1-OH              | 0.017 ± 0.018<br>0.015 (0.000 – 0.075) | 0.028 ± 0.012<br>0.024 (0.013 – 0.053)          | 0.027 ± 0.016<br>0.017 (0.011 – 0.075)                   | 0.031 ± 0.024<br>0.020 (0.000 – 0.10)                    | 4 × 10 <sup>-3</sup>        | T                        |
| C18:2                 | 0.031 ± 0.009<br>0.029 (0.013 – 0.055) | 0.042 ± 0.014<br>0.039 (0.020–0.081)            | 0.033 ± 0.015<br>0.030 (0.015 – 0.094)                   | 0.047 ± 0.015<br>0.048 (0.025 – 0.093)                   | 6 × 10 <sup>-7</sup>        | T                        |
| C2                    | 4.96 ± 1.68<br>4.90 (1.78 – 11.3)      | 4.65 ± 3.47<br>3.38 (0.51 – 14.0)               | 4.21 ± 1.70<br>3.95 (0.98 – 7.90)                        | 6.97 ± 2.67<br>6.55 (3.16 – 13.2)                        | 1 × 10 <sup>-6</sup>        | T                        |
| C3                    | 0.36 ± 0.11<br>0.36 (0.13 – 0.61)      | 0.25 ± 0.077<br>0.23 (0.14 – 0.49)              | 0.33 ± 0.13<br>0.30 (0.14 – 0.65)                        | 0.54 ± 0.17<br>0.504 (0.28 – 1.00)                       | 1 × 10 <sup>-18</sup>       | T                        |
| C3-DC(C4-OH)          | 0.036 ± 0.023<br>0.043 (0.000 – 0.092) | 0.062 ± 0.048<br>0.053 (0.025 – 0.32)           | 0.049 ± 0.017<br>0.045 (0.029 – 0.13)                    | 0.050 ± 0.028<br>0.042 (0.000 – 0.12)                    | 3 × 10 <sup>-3</sup>        | T                        |
| C5-OH(C3-DC-M)        | 0.035 ± 0.032<br>0.049 (0.000 – 0.091) | 0.060 ± 0.015<br>0.057 (0.036 – 0.11)           | 0.061 ± 0.015<br>0.059 (0.035 – 0.12)                    | 0.062 ± 0.029<br>0.055 (0.000 – 0.15)                    | 3 × 10 <sup>-5</sup>        | T                        |

*Continued.*

|                                          | CSs                                         | FEP <sub>b</sub>                           | FEP <sub>(0.6-year)</sub>                   | FEP <sub>(5.1-year)</sub>                  | Comparison between models   |                          |
|------------------------------------------|---------------------------------------------|--------------------------------------------|---------------------------------------------|--------------------------------------------|-----------------------------|--------------------------|
|                                          | Mean ± SD<br>Median (range)                 | Mean ± SD<br>Median (range)                | Mean ± SD<br>Median (range)                 | Mean ± SD<br>Median (range)                | Adjusted<br><i>p</i> -value | True (T) or<br>false (F) |
| <b>Acylcarnitines</b>                    |                                             |                                            |                                             |                                            |                             |                          |
| C3-OH                                    | 0.028 ± 0.037<br>0.035 (0.000 – 0.25)       | 0.038 ± 0.010<br>0.040 (0.018 – 0.066)     | 0.043 ± 0.018<br>0.039 (0.023 – 0.14)       | 0.062 ± 0.060<br>0.044 (0.000 – 0.31)      | 2 × 10 <sup>-2</sup>        | F                        |
| C3:1                                     | 0.018 ± 0.017<br>0.026 (0.000 – 0.069)      | 0.030 ± 0.007<br>0.030 (0.018 – 0.048)     | 0.036 ± 0.035<br>0.031 (0.019 – 0.26)       | 0.042 ± 0.029<br>0.035 (0.000 – 0.12)      | 6 × 10 <sup>-3</sup>        | F                        |
| C4                                       | 0.22 ± 0.069<br>0.21 (0.12 – 0.42)          | 0.15 ± 0.043<br>0.15 (0.071 – 0.32)        | 0.17 ± 0.052<br>0.17 (0.077 – 0.31)         | 0.32 ± 0.11<br>0.31 (0.13 – 0.56)          | 1 × 10 <sup>-15</sup>       | T                        |
| C4:1                                     | 0.026 ± 0.025<br>0.036 (0.000 – 0.089)      | 0.046 ± 0.009<br>0.046 (0.027 – 0.061)     | 0.051 ± 0.033<br>0.045 (0.030 – 0.26)       | 0.064 ± 0.038<br>0.060 (0.000 – 0.16)      | 2 × 10 <sup>-5</sup>        | T                        |
| C5                                       | 0.17 ± 0.050<br>0.16 (0.000 – 0.32)         | 0.14 ± 0.042<br>0.14 (0.065 – 0.31)        | 0.17 ± 0.069<br>0.16 (0.075 – 0.39)         | 0.18 ± 0.067<br>0.18 (0.073 – 0.34)        | 4 × 10 <sup>-4</sup>        | T                        |
| C5-M-DC                                  | 0.023 ± 0.021<br>0.031 (0.000 – 0.074)      | 0.034 ± 0.011<br>0.037 (0.014 – 0.059)     | 0.036 ± 0.013<br>0.036 (0.010 – 0.089)      | 0.030 ± 0.022<br>0.023 (0.000 – 0.10)      | 2 × 10 <sup>-2</sup>        | F                        |
| C5:1                                     | 0.044 ± 0.040<br>0.056 (0.000 – 0.12)       | 0.076 ± 0.017<br>0.075 (0.040 – 0.14)      | 0.074 ± 0.021<br>0.071 (0.043 – 0.17)       | 0.091 ± 0.057<br>0.078 (0.000 – 0.28)      | 5 × 10 <sup>-4</sup>        | T                        |
| C5:1-DC                                  | 0.015 ± 0.014<br>0.020 (0.000 – 0.053)      | 0.023 ± 0.006<br>0.025 (0.010 – 0.032)     | 0.024 ± 0.008<br>0.023 (0.010 – 0.053)      | 0.024 ± 0.017<br>0.019 (0.000 – 0.083)     | 1 × 10 <sup>-2</sup>        | F                        |
| <b>Hexoses, ratios of acylcarnitines</b> |                                             |                                            |                                             |                                            |                             |                          |
| Hexoses                                  | 4144 ± 823<br>4094 (2780 – 6663)            | 4258 ± 750<br>4075 (2802 – 5918)           | 4287 ± 867<br>4264 (2760 – 7189)            | 4887 ± 1104<br>4711 (3086 – 7271)          | 1 × 10 <sup>-3</sup>        | T                        |
| (C16+C18)/C0                             | 0.0040 ± 0.0013<br>0.0036 (0.0023 – 0.0092) | 0.0049 ± 0.0016<br>0.0046 (0.0019 – 0.010) | 0.0041 ± 0.0011<br>0.0037 (0.0025 – 0.0069) | 0.0046 ± 0.0020<br>0.0041 (0.0020 – 0.010) | 5 × 10 <sup>-3</sup>        | T                        |
| (C16+C18:1)/C2                           | 0.043 ± 0.015<br>0.038 (0.023 – 0.092)      | 0.085 ± 0.082<br>0.063 (0.022 – 0.50)      | 0.054 ± 0.047<br>0.042 (0.018 – 0.28)       | 0.037 ± 0.009<br>0.034 (0.019 – 0.056)     | 5 × 10 <sup>-10</sup>       | T                        |
| (C2+C3+C4+C5)/C0                         | 0.19 ± 0.091<br>0.18 (0.066 – 0.73)         | 0.16 ± 0.12<br>0.12 (0.024 – 0.55)         | 0.16 ± 0.086<br>0.16 (0.033 – 0.61)         | 0.22 ± 0.084<br>0.20 (0.11 – 0.44)         | 2 × 10 <sup>-5</sup>        | T                        |

**Table S2.** Estimated effects of the complex set of predictor variables on serum concentrations of inflammatory and metabolic protein biomarkers, acylcarnitines, hexoses, body mass index and waist circumference between control subjects (CSs, n = 58), first-episode psychosis patients at baseline (before treatment with antipsychotics, FEP<sub>b</sub>, n = 54), after 0.6-year treatment (FEP<sub>0.6-year</sub>, n = 47), and after 5.1-year treatment (FEP<sub>5.1-year</sub>, n = 38) with antipsychotics: results from linear mixed-effects model.

|                                                   | Intercept                                                                                      | Age                                 | Gender                                            | Smoking status                      | Disease and Treatment Effect                  |                                               |                                               | Time-Diff1                                       | Time-Diff2                            |
|---------------------------------------------------|------------------------------------------------------------------------------------------------|-------------------------------------|---------------------------------------------------|-------------------------------------|-----------------------------------------------|-----------------------------------------------|-----------------------------------------------|--------------------------------------------------|---------------------------------------|
|                                                   |                                                                                                |                                     |                                                   |                                     | FEP patients before treatment                 | FEP patients after 0.6-year treatment         | FEP patients after 5.1-year treatment         |                                                  |                                       |
|                                                   | Effects of Independent Variables on the Dependent Variable ( <i>F</i> -Value, <i>p</i> -Value) |                                     |                                                   |                                     |                                               |                                               |                                               |                                                  |                                       |
|                                                   | <i>t</i> -Value, <i>p</i> -Value                                                               |                                     |                                                   |                                     |                                               |                                               |                                               |                                                  |                                       |
| <b>Body mass index (BMI), waist circumference</b> |                                                                                                |                                     |                                                   |                                     |                                               |                                               |                                               |                                                  |                                       |
| BMI                                               | $F_{(1,110)} = 1798$ ,<br>$p < 1 \times 10^{-4}$                                               | $F_{(1,77)} = 2.83$ ,<br>$p = 0.10$ | $F_{(1,110)} = 0.41$ ,<br>$p = 0.52$              | $F_{(2,77)} = 0.39$ ,<br>$p = 0.67$ | $F_{(3,77)} = 26.88$ , $p < 1 \times 10^{-4}$ |                                               |                                               | $F_{(1,77)} = 1.29$ ,<br>$p = 0.26$              | $F_{(1,77)} = 3.90$ ,<br>$p = 0.05$   |
|                                                   |                                                                                                |                                     |                                                   |                                     | $t_{(77)} = -0.13$ ,<br>$p = 0.90$            | $t_{(77)} = 3.59$ ,<br>$p = 6 \times 10^{-4}$ | $t_{(77)} = 4.63$ ,<br>$p < 1 \times 10^{-4}$ |                                                  |                                       |
| Waist circumference                               | $F_{(1,110)} = 5466$ ,<br>$p < 1 \times 10^{-4}$                                               | $F_{(1,77)} = 1.00$ ,<br>$p = 0.32$ | $F_{(1,110)} = 24.18$ ,<br>$p < 1 \times 10^{-4}$ | $F_{(2,77)} = 0.66$ ,<br>$p = 0.52$ | $F_{(3,77)} = 24.27$ , $p < 1 \times 10^{-4}$ |                                               |                                               | $F_{(1,77)} = 0.24$ ,<br>$p = 0.62$              | $F_{(1,77)} = 0.19$ ,<br>$p = 0.67$   |
|                                                   |                                                                                                |                                     |                                                   |                                     | $t_{(77)} = 0.91$ ,<br>$p = 0.36$             | $t_{(77)} = 4.00$ ,<br>$p = 1 \times 10^{-4}$ | $t_{(77)} = 5.50$ ,<br>$p < 1 \times 10^{-4}$ |                                                  |                                       |
| <b>Inflammatory biomarkers</b>                    |                                                                                                |                                     |                                                   |                                     |                                               |                                               |                                               |                                                  |                                       |
| Interleukin (IL)-2                                | $F_{(1,109)} = 9.84$ ,<br>$p = 2 \times 10^{-3}$                                               | $F_{(1,73)} = 0.01$ ,<br>$p = 0.92$ | $F_{(1,109)} = 0.95$ ,<br>$p = 0.33$              | $F_{(2,73)} = 0.70$ ,<br>$p = 0.50$ | $F_{(3,73)} = 15.85$ , $p < 1 \times 10^{-4}$ |                                               |                                               | $F_{(1,73)} = 0.28$ ,<br>$p = 0.60$              | $F_{(1,73)} = 0.39$ ,<br>$p = 0.53$   |
|                                                   |                                                                                                |                                     |                                                   |                                     | $t_{(73)} = 4.92$ ,<br>$p < 1 \times 10^{-4}$ | $t_{(73)} = 1.61$ ,<br>$p = 0.11$             | $t_{(73)} = 4.31$ ,<br>$p = 1 \times 10^{-4}$ |                                                  |                                       |
| IL-4                                              | $F_{(1,109)} = 0.0007$ ,<br>$p = 0.98$                                                         | $F_{(1,72)} = 0.12$ ,<br>$p = 0.73$ | $F_{(1,109)} = 3.68$ ,<br>$p = 0.06$              | $F_{(2,72)} = 0.53$ ,<br>$p = 0.59$ | $F_{(3,72)} = 19.80$ , $p < 1 \times 10^{-4}$ |                                               |                                               | $F_{(1,72)} = 0.004$ ,<br>$p = 0.95$             | $F_{(1,72)} = 0.34$ ,<br>$p = 0.56$   |
|                                                   |                                                                                                |                                     |                                                   |                                     | $t_{(72)} = 5.95$ ,<br>$p < 1 \times 10^{-4}$ | $t_{(72)} = 3.43$ ,<br>$p = 1 \times 10^{-3}$ | $t_{(72)} = 6.52$ ,<br>$p < 1 \times 10^{-4}$ |                                                  |                                       |
| IL-6                                              | $F_{(1,109)} = 2.51$ ,<br>$p = 0.12$                                                           | $F_{(1,72)} = 0.33$ ,<br>$p = 0.56$ | $F_{(1,109)} = 0.19$ ,<br>$p = 0.67$              | $F_{(2,72)} = 3.83$ ,<br>$p = 0.03$ | $F_{(3,72)} = 7.53$ , $p = 2 \times 10^{-4}$  |                                               |                                               | $F_{(1,72)} = 0.15$ ,<br>$p = 0.70$              | $F_{(1,72)} = 0.0001$ ,<br>$p = 0.99$ |
|                                                   |                                                                                                |                                     |                                                   |                                     | $t_{(72)} = 4.22$ ,<br>$p = 1 \times 10^{-4}$ | $t_{(72)} = 2.19$ ,<br>$p = 0.03$             | $t_{(72)} = 3.80$ ,<br>$p = 3 \times 10^{-4}$ |                                                  |                                       |
| IL-8                                              | $F_{(1,109)} = 60.06$ ,<br>$p < 1 \times 10^{-4}$                                              | $F_{(1,72)} = 3.83$ ,<br>$p = 0.05$ | $F_{(1,108)} = 0.93$ ,<br>$p = 0.34$              | $F_{(2,72)} = 0.68$ ,<br>$p = 0.51$ | $F_{(3,72)} = 2.70$ , $p = 0.05$              |                                               |                                               | $F_{(1,72)} = 13.00$ ,<br>$p = 6 \times 10^{-4}$ | $F_{(1,72)} = 2.88$ ,<br>$p = 0.09$   |
|                                                   |                                                                                                |                                     |                                                   |                                     | $t_{(72)} = 0.65$ ,<br>$p = 0.52$             | $t_{(72)} = -0.51$ ,<br>$p = 0.62$            | $t_{(72)} = 1.59$ ,<br>$p = 0.11$             |                                                  |                                       |

*Continued.*

|                                            | Intercept                                                                                      | Age                           | Gender                                      | Smoking status                | Disease and Treatment Effect               |                                       |                                         | Time-Diff1                      | Time-Diff2                     |
|--------------------------------------------|------------------------------------------------------------------------------------------------|-------------------------------|---------------------------------------------|-------------------------------|--------------------------------------------|---------------------------------------|-----------------------------------------|---------------------------------|--------------------------------|
|                                            |                                                                                                |                               |                                             |                               | FEP patients before treatment              | FEP patients after 0.6-year treatment | FEP patients after 5.1-year treatment   |                                 |                                |
|                                            | Effects of Independent Variables on the Dependent Variable ( <i>F</i> -Value, <i>p</i> -Value) |                               |                                             |                               |                                            |                                       |                                         |                                 |                                |
|                                            | <i>t</i> -Value, <i>p</i> -Value                                                               |                               |                                             |                               |                                            |                                       |                                         |                                 |                                |
| <i>Inflammatory biomarkers</i>             |                                                                                                |                               |                                             |                               |                                            |                                       |                                         |                                 |                                |
| IL-10                                      | $F_{(1,109)} = 0.57, p = 0.45$                                                                 | $F_{(1,73)} = 0.72, p = 0.40$ | $F_{(1,109)} = 0.44, p = 0.51$              | $F_{(2,73)} = 2.27, p = 0.11$ | $F_{(3,73)} = 14.42, p < 1 \times 10^{-4}$ |                                       |                                         | $F_{(1,73)} = 0.64, p = 0.43$   | $F_{(1,73)} = 0.002, p = 0.96$ |
|                                            |                                                                                                |                               |                                             |                               | $t_{(73)} = 0.80, p = 0.43$                | $t_{(73)} = 0.72, p = 0.48$           | $t_{(73)} = 5.82, p < 1 \times 10^{-4}$ |                                 |                                |
| IL-1A                                      | $F_{(1,109)} = 41.84, p < 1 \times 10^{-4}$                                                    | $F_{(1,73)} = 0.01, p = 0.92$ | $F_{(1,109)} = 0.06, p = 0.80$              | $F_{(2,73)} = 1.31, p = 0.28$ | $F_{(3,73)} = 9.21, p < 1 \times 10^{-4}$  |                                       |                                         | $F_{(1,73)} = 0.008, p = 0.93$  | $F_{(1,73)} = 0.33, p = 0.57$  |
|                                            |                                                                                                |                               |                                             |                               | $t_{(73)} = 3.44, p = 1 \times 10^{-3}$    | $t_{(73)} = 2.00, p = 0.05$           | $t_{(73)} = 4.32, p < 1 \times 10^{-4}$ |                                 |                                |
| IL-1B                                      | $F_{(1,108)} = 8.21, p = 5 \times 10^{-3}$                                                     | $F_{(1,72)} = 6.69, p = 0.01$ | $F_{(1,108)} = 0.28, p = 0.59$              | $F_{(2,72)} = 0.94, p = 0.40$ | $F_{(3,72)} = 2.04, p = 0.12$              |                                       |                                         | $F_{(1,72)} = 0.03, p = 0.86$   | $F_{(1,72)} = 1.14, p = 0.29$  |
|                                            |                                                                                                |                               |                                             |                               | $t_{(72)} = -0.72, p = 0.47$               | $t_{(72)} = -1.34, p = 0.19$          | $t_{(72)} = 0.89, p = 0.37$             |                                 |                                |
| Interferon gamma (IFN-γ)                   | $F_{(1,108)} = 53.20, p < 1 \times 10^{-4}$                                                    | $F_{(1,70)} = 0.19, p = 0.66$ | $F_{(1,108)} = 0.49, p = 0.48$              | $F_{(2,70)} = 2.26, p = 0.11$ | $F_{(3,70)} = 14.34, p < 1 \times 10^{-4}$ |                                       |                                         | $F_{(1,70)} = 0.47, p = 0.49$   | $F_{(1,70)} = 3.87, p = 0.05$  |
|                                            |                                                                                                |                               |                                             |                               | $t_{(70)} = 2.64, p = 0.01$                | $t_{(70)} = -1.52, p = 0.13$          | $t_{(70)} = 3.74, p = 4 \times 10^{-4}$ |                                 |                                |
| Tumor necrosis factor-alpha (TNF-α)        | $F_{(1,109)} = 24.72, p < 1 \times 10^{-4}$                                                    | $F_{(1,72)} = 1.65, p = 0.20$ | $F_{(1,109)} = 3.19, p = 0.08$              | $F_{(2,72)} = 1.77, p = 0.18$ | $F_{(3,72)} = 3.73, p = 0.01$              |                                       |                                         | $F_{(1,72)} = 1.45, p = 0.23$   | $F_{(1,72)} = 4.62, p = 0.03$  |
|                                            |                                                                                                |                               |                                             |                               | $t_{(72)} = -0.62, p = 0.54$               | $t_{(72)} = -0.88, p = 0.38$          | $t_{(72)} = 1.41, p = 0.16$             |                                 |                                |
| Monocyte chemoattractant protein-1 (MCP-1) | $F_{(1,109)} = 318.9, p < 1 \times 10^{-4}$                                                    | $F_{(1,73)} = 5.95, p = 0.02$ | $F_{(1,109)} = 1.44, p = 0.23$              | $F_{(2,73)} = 1.48, p = 0.23$ | $F_{(3,73)} = 4.03, p = 0.01$              |                                       |                                         | $F_{(1,73)} = 0.0001, p = 0.99$ | $F_{(1,73)} = 4.54, p = 0.04$  |
|                                            |                                                                                                |                               |                                             |                               | $t_{(73)} = -0.02, p = 0.98$               | $t_{(73)} = 0.42, p = 0.67$           | $t_{(73)} = 2.48, p = 0.02$             |                                 |                                |
| Ferritin                                   | $F_{(1,109)} = 86.73, p < 1 \times 10^{-4}$                                                    | $F_{(1,74)} = 4.75, p = 0.03$ | $F_{(1,109)} = 76.03, p < 1 \times 10^{-4}$ | $F_{(2,74)} = 0.20, p = 0.82$ | $F_{(3,74)} = 6.07, p = 9 \times 10^{-4}$  |                                       |                                         | $F_{(1,74)} = 0.92, p = 0.34$   | $F_{(1,74)} = 0.39, p = 0.54$  |
|                                            |                                                                                                |                               |                                             |                               | $t_{(74)} = 3.52, p = 7 \times 10^{-4}$    | $t_{(74)} = 1.29, p = 0.20$           | $t_{(74)} = 1.99, p = 0.05$             |                                 |                                |

Continued.

|                                           | Intercept                                                                                      | Age                                 | Gender                                            | Smoking status                                  | Disease and Treatment Effect                  |                                       |                                                | Time-Diff1                          | Time-Diff2                          |
|-------------------------------------------|------------------------------------------------------------------------------------------------|-------------------------------------|---------------------------------------------------|-------------------------------------------------|-----------------------------------------------|---------------------------------------|------------------------------------------------|-------------------------------------|-------------------------------------|
|                                           |                                                                                                |                                     |                                                   |                                                 | FEP patients before treatment                 | FEP patients after 0.6-year treatment | FEP patients after 5.1-year treatment          |                                     |                                     |
|                                           | Effects of Independent Variables on the Dependent Variable ( <i>F</i> -Value, <i>p</i> -Value) |                                     |                                                   |                                                 |                                               |                                       |                                                |                                     |                                     |
|                                           | <i>t</i> -Value, <i>p</i> -Value                                                               |                                     |                                                   |                                                 |                                               |                                       |                                                |                                     |                                     |
| <i>Metabolic biomarkers</i>               |                                                                                                |                                     |                                                   |                                                 |                                               |                                       |                                                |                                     |                                     |
| Resistin                                  | $F_{(1,109)} = 32.53$ ,<br>$p < 1 \times 10^{-4}$                                              | $F_{(1,74)} = 0.17$ ,<br>$p = 0.68$ | $F_{(1,109)} = 0.04$ ,<br>$p = 0.84$              | $F_{(2,74)} = 0.25$ ,<br>$p = 0.78$             | $F_{(3,74)} = 8.96$ , $p = 1 \times 10^{-4}$  |                                       |                                                | $F_{(1,74)} = 0.10$ ,<br>$p = 0.76$ | $F_{(1,74)} = 0.54$ ,<br>$p = 0.46$ |
|                                           |                                                                                                |                                     |                                                   |                                                 | $t_{(74)} = 2.68$ ,<br>$p = 9 \times 10^{-3}$ | $t_{(74)} = 0.77$ ,<br>$p = 0.44$     | $t_{(74)} = -2.40$ ,<br>$p = 0.02$             |                                     |                                     |
| Insulin                                   | $F_{(1,108)} = 60.79$ ,<br>$p < 1 \times 10^{-4}$                                              | $F_{(1,74)} = 1.03$ ,<br>$p = 0.31$ | $F_{(1,108)} = 0.18$ ,<br>$p = 0.67$              | $F_{(2,74)} = 0.98$ ,<br>$p = 0.38$             | $F_{(3,74)} = 4.12$ , $p = 9 \times 10^{-3}$  |                                       |                                                | $F_{(1,74)} = 0.52$ ,<br>$p = 0.47$ | $F_{(1,74)} = 1.29$ ,<br>$p = 0.26$ |
|                                           |                                                                                                |                                     |                                                   |                                                 | $t_{(74)} = -1.35$ ,<br>$p = 0.18$            | $t_{(74)} = 1.17$ ,<br>$p = 0.25$     | $t_{(74)} = -2.15$ ,<br>$p = 0.03$             |                                     |                                     |
| Leptin                                    | $F_{(1,108)} = 0.47$ ,<br>$p = 0.49$                                                           | $F_{(1,71)} = 0.94$ ,<br>$p = 0.33$ | $F_{(1,108)} = 34.62$ ,<br>$p < 1 \times 10^{-4}$ | $F_{(2,71)} = 0.67$ ,<br>$p = 0.51$             | $F_{(3,71)} = 9.11$ , $p < 1 \times 10^{-4}$  |                                       |                                                | $F_{(1,71)} = 0.27$ ,<br>$p = 0.60$ | $F_{(1,71)} = 0.93$ ,<br>$p = 0.34$ |
|                                           |                                                                                                |                                     |                                                   |                                                 | $t_{(71)} = -0.33$ ,<br>$p = 0.74$            | $t_{(71)} = 2.29$ ,<br>$p = 0.02$     | $t_{(74)} = 3.43$ ,<br>$p = 1 \times 10^{-3}$  |                                     |                                     |
| Plasminogen activator inhibitor-1 (PAI-1) | $F_{(1,109)} = 68.21$ ,<br>$p < 1 \times 10^{-4}$                                              | $F_{(1,73)} = 2.18$ ,<br>$p = 0.14$ | $F_{(1,109)} = 0.14$ ,<br>$p = 0.71$              | $F_{(2,73)} = 6.10$ ,<br>$p = 4 \times 10^{-3}$ | $F_{(3,74)} = 8.62$ , $p = 1 \times 10^{-4}$  |                                       |                                                | $F_{(1,73)} = 0.79$ ,<br>$p = 0.38$ | $F_{(1,73)} = 1.05$ ,<br>$p = 0.31$ |
|                                           |                                                                                                |                                     |                                                   |                                                 | $t_{(73)} = 2.03$ ,<br>$p = 0.05$             | $t_{(73)} = 0.39$ ,<br>$p = 0.70$     | $t_{(73)} = -2.86$ ,<br>$p = 6 \times 10^{-3}$ |                                     |                                     |
| <i>Acylcarnitines</i>                     |                                                                                                |                                     |                                                   |                                                 |                                               |                                       |                                                |                                     |                                     |
| C0                                        | $F_{(1,109)} = 1008$ ,<br>$p < 1 \times 10^{-4}$                                               | $F_{(1,74)} = 0.71$ ,<br>$p = 0.40$ | $F_{(1,109)} = 17.05$ ,<br>$p = 1 \times 10^{-4}$ | $F_{(2,74)} = 0.02$ ,<br>$p = 0.98$             | $F_{(3,74)} = 0.66$ , $p = 0.58$              |                                       |                                                | $F_{(1,74)} = 0.03$ ,<br>$p = 0.87$ | $F_{(1,74)} = 0.09$ ,<br>$p = 0.76$ |
|                                           |                                                                                                |                                     |                                                   |                                                 | $t_{(74)} = 0.96$ ,<br>$p = 0.34$             | $t_{(74)} = 0.42$ ,<br>$p = 0.67$     | $t_{(74)} = 1.26$ ,<br>$p = 0.21$              |                                     |                                     |
| C16                                       | $F_{(1,109)} = 381.8$ ,<br>$p < 1 \times 10^{-4}$                                              | $F_{(1,73)} = 2.09$ ,<br>$p = 0.15$ | $F_{(1,109)} = 3.71$ ,<br>$p = 0.06$              | $F_{(2,73)} = 2.75$ ,<br>$p = 0.07$             | $F_{(3,73)} = 10.42$ , $p < 1 \times 10^{-4}$ |                                       |                                                | $F_{(1,73)} = 1.55$ ,<br>$p = 0.22$ | $F_{(1,73)} = 1.32$ ,<br>$p = 0.25$ |
|                                           |                                                                                                |                                     |                                                   |                                                 | $t_{(73)} = 5.25$ ,<br>$p < 1 \times 10^{-4}$ | $t_{(73)} = 1.36$ ,<br>$p = 0.18$     | $t_{(73)} = 3.02$ ,<br>$p = 3 \times 10^{-3}$  |                                     |                                     |
| C16-OH                                    | $F_{(1,109)} = 0.04$ ,<br>$p = 0.85$                                                           | $F_{(1,74)} = 0.05$ ,<br>$p = 0.82$ | $F_{(1,109)} = 0.02$ ,<br>$p = 0.89$              | $F_{(2,74)} = 0.52$ ,<br>$p = 0.59$             | $F_{(3,74)} = 4.00$ , $p = 0.01$              |                                       |                                                | $F_{(1,74)} = 0.04$ ,<br>$p = 0.84$ | $F_{(1,74)} = 0.40$ ,<br>$p = 0.53$ |
|                                           |                                                                                                |                                     |                                                   |                                                 | $t_{(74)} = 0.66$ ,<br>$p = 0.51$             | $t_{(74)} = 0.92$ ,<br>$p = 0.36$     | $t_{(74)} = 3.26$ ,<br>$p = 2 \times 10^{-3}$  |                                     |                                     |
| C16:1                                     | $F_{(1,91)} = 557.2$ ,<br>$p < 1 \times 10^{-4}$                                               | $F_{(1,71)} = 0.92$ ,<br>$p = 0.34$ | $F_{(1,91)} = 0.67$ ,<br>$p = 0.41$               | $F_{(2,71)} = 1.14$ ,<br>$p = 0.33$             | $F_{(3,71)} = 8.44$ , $p = 1 \times 10^{-4}$  |                                       |                                                | $F_{(1,71)} = 2.30$ ,<br>$p = 0.13$ | $F_{(1,71)} = 1.23$ ,<br>$p = 0.27$ |
|                                           |                                                                                                |                                     |                                                   |                                                 | $t_{(71)} = 3.96$ ,<br>$p = 2 \times 10^{-4}$ | $t_{(71)} = 0.50$ ,<br>$p = 0.62$     | $t_{(71)} = 3.40$ ,<br>$p = 1 \times 10^{-3}$  |                                     |                                     |

Continued.

|                       | Intercept                                                                                      | Age                                 | Gender                               | Smoking status                      | Disease and Treatment Effect                  |                                               |                                               | Time-Diff1                          | Time-Diff2                            |
|-----------------------|------------------------------------------------------------------------------------------------|-------------------------------------|--------------------------------------|-------------------------------------|-----------------------------------------------|-----------------------------------------------|-----------------------------------------------|-------------------------------------|---------------------------------------|
|                       |                                                                                                |                                     |                                      |                                     | FEP patients before treatment                 | FEP patients after 0.6-year treatment         | FEP patients after 5.1-year treatment         |                                     |                                       |
|                       | Effects of Independent Variables on the Dependent Variable ( <i>F</i> -Value, <i>p</i> -Value) |                                     |                                      |                                     |                                               |                                               |                                               |                                     |                                       |
|                       | <i>t</i> -Value, <i>p</i> -Value                                                               |                                     |                                      |                                     |                                               |                                               |                                               |                                     |                                       |
| <b>Acylcarnitines</b> |                                                                                                |                                     |                                      |                                     |                                               |                                               |                                               |                                     |                                       |
| C16:1-OH              | $F_{(1,109)} = 0.02$ ,<br>$p = 0.88$                                                           | $F_{(1,74)} = 0.36$ ,<br>$p = 0.58$ | $F_{(1,109)} = 0.08$ ,<br>$p = 0.77$ | $F_{(2,74)} = 0.20$ ,<br>$p = 0.82$ | $F_{(3,74)} = 4.67, p = 5 \times 10^{-3}$     |                                               |                                               | $F_{(1,74)} = 0.02$ ,<br>$p = 0.89$ | $F_{(1,74)} = 0.32$ ,<br>$p = 0.57$   |
|                       |                                                                                                |                                     |                                      |                                     | $t_{(74)} = 1.13$ ,<br>$p = 0.26$             | $t_{(74)} = 1.07$ ,<br>$p = 0.29$             | $t_{(74)} = 3.56$ ,<br>$p = 6 \times 10^{-4}$ |                                     |                                       |
| C16:2                 | $F_{(1,84)} = 535.1$ ,<br>$p < 1 \times 10^{-4}$                                               | $F_{(1,71)} = 0.20$ ,<br>$p = 0.66$ | $F_{(1,84)} = 0.13$ ,<br>$p = 0.71$  | $F_{(2,71)} = 0.47$ ,<br>$p = 0.63$ | $F_{(3,71)} = 9.31, p < 1 \times 10^{-4}$     |                                               |                                               | $F_{(1,71)} = 1.78$ ,<br>$p = 0.19$ | $F_{(1,71)} = 0.69$ ,<br>$p = 0.41$   |
|                       |                                                                                                |                                     |                                      |                                     | $t_{(71)} = 1.20$ ,<br>$p = 0.24$             | $t_{(71)} = -0.30$ ,<br>$p = 0.76$            | $t_{(71)} = 4.26$ ,<br>$p = 1 \times 10^{-4}$ |                                     |                                       |
| C16:2-OH              | $F_{(1,109)} = 4.90$ ,<br>$p = 0.03$                                                           | $F_{(1,74)} = 1.76$ ,<br>$p = 0.19$ | $F_{(1,109)} = 0.46$ ,<br>$p = 0.50$ | $F_{(2,74)} = 0.70$ ,<br>$p = 0.50$ | $F_{(3,74)} = 6.77, p = 4 \times 10^{-4}$     |                                               |                                               | $F_{(1,74)} = 0.03$ ,<br>$p = 0.87$ | $F_{(1,74)} = 0.40$ ,<br>$p = 0.53$   |
|                       |                                                                                                |                                     |                                      |                                     | $t_{(74)} = 3.70$ ,<br>$p = 4 \times 10^{-4}$ | $t_{(74)} = 4.35$ ,<br>$p < 1 \times 10^{-4}$ | $t_{(74)} = 2.97$ ,<br>$p = 4 \times 10^{-3}$ |                                     |                                       |
| C18                   | $F_{(1,103)} = 603.2$ ,<br>$p < 1 \times 10^{-4}$                                              | $F_{(1,74)} = 0.78$ ,<br>$p = 0.38$ | $F_{(1,103)} = 0.45$ ,<br>$p = 0.50$ | $F_{(2,74)} = 0.05$ ,<br>$p = 0.95$ | $F_{(3,74)} = 5.12, p = 3 \times 10^{-3}$     |                                               |                                               | $F_{(1,74)} = 0.57$ ,<br>$p = 0.45$ | $F_{(1,74)} = 2.50$ ,<br>$p = 0.12$   |
|                       |                                                                                                |                                     |                                      |                                     | $t_{(74)} = 2.63$ ,<br>$p = 0.01$             | $t_{(74)} = 0.63$ ,<br>$p = 0.53$             | $t_{(74)} = 3.04$ ,<br>$p = 3 \times 10^{-3}$ |                                     |                                       |
| C18:1                 | $F_{(1,89)} = 245.7$ ,<br>$p < 1 \times 10^{-4}$                                               | $F_{(1,72)} = 0.66$ ,<br>$p = 0.42$ | $F_{(1,89)} = 0.05$ ,<br>$p = 0.82$  | $F_{(2,72)} = 1.20$ ,<br>$p = 0.31$ | $F_{(3,72)} = 16.02, p < 1 \times 10^{-4}$    |                                               |                                               | $F_{(1,72)} = 2.53$ ,<br>$p = 0.12$ | $F_{(1,72)} = 0.0005$ ,<br>$p = 0.98$ |
|                       |                                                                                                |                                     |                                      |                                     | $t_{(72)} = 4.72$ ,<br>$p < 1 \times 10^{-4}$ | $t_{(72)} = -0.02$ ,<br>$p = 0.98$            | $t_{(72)} = 4.01$ ,<br>$p = 1 \times 10^{-4}$ |                                     |                                       |
| C18:1-OH              | $F_{(1,109)} = 8.28$ ,<br>$p = 5 \times 10^{-3}$                                               | $F_{(1,74)} = 0.11$ ,<br>$p = 0.74$ | $F_{(1,109)} = 1.55$ ,<br>$p = 0.22$ | $F_{(2,74)} = 2.49$ ,<br>$p = 0.09$ | $F_{(3,74)} = 5.49, p = 2 \times 10^{-3}$     |                                               |                                               | $F_{(1,74)} = 1.55$ ,<br>$p = 0.22$ | $F_{(1,74)} = 0.12$ ,<br>$p = 0.73$   |
|                       |                                                                                                |                                     |                                      |                                     | $t_{(74)} = 3.27$ ,<br>$p = 2 \times 10^{-3}$ | $t_{(74)} = 2.90$ ,<br>$p = 5 \times 10^{-3}$ | $t_{(74)} = 3.48$ ,<br>$p = 9 \times 10^{-4}$ |                                     |                                       |
| C18:2                 | $F_{(1,99)} = 517.0$ ,<br>$p < 1 \times 10^{-4}$                                               | $F_{(1,72)} = 1.36$ ,<br>$p = 0.25$ | $F_{(1,99)} = 2.09$ ,<br>$p = 0.15$  | $F_{(2,72)} = 0.10$ ,<br>$p = 0.91$ | $F_{(3,72)} = 13.85, p < 1 \times 10^{-4}$    |                                               |                                               | $F_{(1,72)} = 1.62$ ,<br>$p = 0.21$ | $F_{(1,72)} = 0.41$ ,<br>$p = 0.52$   |
|                       |                                                                                                |                                     |                                      |                                     | $t_{(72)} = 3.87$ ,<br>$p = 2 \times 10^{-4}$ | $t_{(72)} = 0.16$ ,<br>$p = 0.87$             | $t_{(72)} = 4.33$ ,<br>$p < 1 \times 10^{-4}$ |                                     |                                       |

Continued.



|                | Intercept                                         | Age                                 | Gender                                            | Smoking status                      | Disease and Treatment Effect                                                                   |                                                |                                               | Time-Diff1                           | Time-Diff2                            |  |  |
|----------------|---------------------------------------------------|-------------------------------------|---------------------------------------------------|-------------------------------------|------------------------------------------------------------------------------------------------|------------------------------------------------|-----------------------------------------------|--------------------------------------|---------------------------------------|--|--|
|                |                                                   |                                     |                                                   |                                     | FEP patients before treatment                                                                  | FEP patients after 0.6-year treatment          | FEP patients after 5.1-year treatment         |                                      |                                       |  |  |
|                |                                                   |                                     |                                                   |                                     | Effects of Independent Variables on the Dependent Variable ( <i>F</i> -Value, <i>p</i> -Value) |                                                |                                               |                                      |                                       |  |  |
|                |                                                   |                                     |                                                   |                                     | <i>t</i> -Value, <i>p</i> -Value                                                               |                                                |                                               |                                      |                                       |  |  |
| Acylcarnitines |                                                   |                                     |                                                   |                                     |                                                                                                |                                                |                                               |                                      |                                       |  |  |
| C2             | $F_{(1,109)} = 57.05$ ,<br>$p < 1 \times 10^{-4}$ | $F_{(1,73)} = 2.77$ ,<br>$p = 0.10$ | $F_{(1,109)} = 3.38$ ,<br>$p = 0.07$              | $F_{(2,73)} = 4.70$ ,<br>$p = 0.01$ | $F_{(3,73)} = 13.25, p < 1 \times 10^{-4}$                                                     |                                                |                                               | $F_{(1,73)} = 0.004$ ,<br>$p = 0.95$ | $F_{(1,73)} = 0.41$ ,<br>$p = 0.52$   |  |  |
|                |                                                   |                                     |                                                   |                                     | $t_{(73)} = -2.02$ ,<br>$p = 0.05$                                                             | $t_{(73)} = -1.36$ ,<br>$p = 0.18$             | $t_{(73)} = 4.24$ ,<br>$p = 1 \times 10^{-4}$ |                                      |                                       |  |  |
| C3             | $F_{(1,109)} = 17.30$ ,<br>$p = 1 \times 10^{-4}$ | $F_{(1,73)} = 1.86$ ,<br>$p = 0.18$ | $F_{(1,109)} = 10.15$ ,<br>$p = 2 \times 10^{-3}$ | $F_{(2,73)} = 0.60$ ,<br>$p = 0.55$ | $F_{(3,73)} = 43.78, p < 1 \times 10^{-4}$                                                     |                                                |                                               | $F_{(1,73)} = 0.39$ ,<br>$p = 0.53$  | $F_{(1,73)} = 4.57$ ,<br>$p = 0.04$   |  |  |
|                |                                                   |                                     |                                                   |                                     | $t_{(73)} = -5.79$ ,<br>$p < 1 \times 10^{-4}$                                                 | $t_{(73)} = -1.80$ ,<br>$p = 0.08$             | $t_{(73)} = 5.27$ ,<br>$p < 1 \times 10^{-4}$ |                                      |                                       |  |  |
| C3-DC(C4-OH)   | $F_{(1,109)} = 0.60$ ,<br>$p = 0.44$              | $F_{(1,74)} = 2.98$ ,<br>$p = 0.09$ | $F_{(1,109)} = 1.49$ ,<br>$p = 0.22$              | $F_{(2,74)} = 1.04$ ,<br>$p = 0.36$ | $F_{(3,74)} = 6.17, p = 8 \times 10^{-4}$                                                      |                                                |                                               | $F_{(1,74)} = 0.22$ ,<br>$p = 0.64$  | $F_{(1,74)} = 0.005$ ,<br>$p = 0.94$  |  |  |
|                |                                                   |                                     |                                                   |                                     | $t_{(74)} = 4.28$ ,<br>$p = 1 \times 10^{-4}$                                                  | $t_{(74)} = 2.16$ ,<br>$p = 0.03$              | $t_{(74)} = 1.60$ ,<br>$p = 0.11$             |                                      |                                       |  |  |
| C5-OH(C3-DC-M) | $F_{(1,109)} = 13.18$ ,<br>$p = 4 \times 10^{-4}$ | $F_{(1,74)} = 0.04$ ,<br>$p = 0.83$ | $F_{(1,109)} = 1.21$ ,<br>$p = 0.27$              | $F_{(2,74)} = 2.19$ ,<br>$p = 0.12$ | $F_{(3,74)} = 11.15, p < 1 \times 10^{-4}$                                                     |                                                |                                               | $F_{(1,74)} = 0.04$ ,<br>$p = 0.84$  | $F_{(1,74)} = 0.0002$ ,<br>$p = 0.99$ |  |  |
|                |                                                   |                                     |                                                   |                                     | $t_{(74)} = 4.94$ ,<br>$p < 1 \times 10^{-4}$                                                  | $t_{(74)} = 5.06$ ,<br>$p < 1 \times 10^{-4}$  | $t_{(74)} = 4.69$ ,<br>$p < 1 \times 10^{-4}$ |                                      |                                       |  |  |
| C3-OH          | $F_{(1,109)} = 1.17$ ,<br>$p = 0.28$              | $F_{(1,74)} = 0.09$ ,<br>$p = 0.77$ | $F_{(1,109)} = 0.21$ ,<br>$p = 0.65$              | $F_{(2,74)} = 0.14$ ,<br>$p = 0.87$ | $F_{(3,74)} = 4.77, p = 4 \times 10^{-3}$                                                      |                                                |                                               | $F_{(1,74)} = 0.10$ ,<br>$p = 0.75$  | $F_{(1,74)} = 0.06$ ,<br>$p = 0.81$   |  |  |
|                |                                                   |                                     |                                                   |                                     | $t_{(74)} = 1.49$ ,<br>$p = 0.14$                                                              | $t_{(74)} = 1.93$ ,<br>$p = 0.06$              | $t_{(74)} = 3.70$ ,<br>$p = 4 \times 10^{-4}$ |                                      |                                       |  |  |
| C3:1           | $F_{(1,109)} = 0.45$ ,<br>$p = 0.50$              | $F_{(1,74)} = 3.28$ ,<br>$p = 0.07$ | $F_{(1,109)} = 0.16$ ,<br>$p = 0.69$              | $F_{(2,74)} = 0.01$ ,<br>$p = 0.99$ | $F_{(3,74)} = 5.44, p = 2 \times 10^{-3}$                                                      |                                                |                                               | $F_{(1,74)} = 0.48$ ,<br>$p = 0.49$  | $F_{(1,74)} = 0.007$ ,<br>$p = 0.93$  |  |  |
|                |                                                   |                                     |                                                   |                                     | $t_{(74)} = 2.33$ ,<br>$p = 0.02$                                                              | $t_{(74)} = 3.38$ ,<br>$p = 1 \times 10^{-3}$  | $t_{(74)} = 3.49$ ,<br>$p = 1 \times 10^{-3}$ |                                      |                                       |  |  |
| C4             | $F_{(1,109)} = 99.47$ ,<br>$p < 1 \times 10^{-4}$ | $F_{(1,73)} = 0.12$ ,<br>$p = 0.72$ | $F_{(1,109)} = 0.58$ ,<br>$p = 0.45$              | $F_{(2,73)} = 0.12$ ,<br>$p = 0.88$ | $F_{(3,73)} = 35.34, p < 1 \times 10^{-4}$                                                     |                                                |                                               | $F_{(1,73)} = 0.44$ ,<br>$p = 0.51$  | $F_{(1,73)} = 1.25$ ,<br>$p = 0.27$   |  |  |
|                |                                                   |                                     |                                                   |                                     | $t_{(73)} = -5.64$ ,<br>$p < 1 \times 10^{-4}$                                                 | $t_{(73)} = -4.43$ ,<br>$p < 1 \times 10^{-4}$ | $t_{(73)} = 4.72$ ,<br>$p < 1 \times 10^{-4}$ |                                      |                                       |  |  |
| C4:1           | $F_{(1,109)} = 2.17$ ,<br>$p = 0.14$              | $F_{(1,74)} = 2.04$ ,<br>$p = 0.16$ | $F_{(1,109)} = 0.24$ ,<br>$p = 0.62$              | $F_{(2,74)} = 0.01$ ,<br>$p = 0.99$ | $F_{(3,74)} = 10.53, p < 1 \times 10^{-4}$                                                     |                                                |                                               | $F_{(1,74)} = 0.50$ ,<br>$p = 0.48$  | $F_{(1,74)} = 0.18$ ,<br>$p = 0.67$   |  |  |
|                |                                                   |                                     |                                                   |                                     | $t_{(74)} = 3.40$ ,<br>$p = 1 \times 10^{-3}$                                                  | $t_{(74)} = 4.13$ ,<br>$p = 1 \times 10^{-4}$  | $t_{(74)} = 5.23$ ,<br>$p < 1 \times 10^{-4}$ |                                      |                                       |  |  |

Continued.

|                          | Intercept                                                                                      | Age                                 | Gender                                            | Smoking status                       | Disease and Treatment Effect                   |                                               |                                               | Time-Diff1                          | Time-Diff2                          |
|--------------------------|------------------------------------------------------------------------------------------------|-------------------------------------|---------------------------------------------------|--------------------------------------|------------------------------------------------|-----------------------------------------------|-----------------------------------------------|-------------------------------------|-------------------------------------|
|                          |                                                                                                |                                     |                                                   |                                      | FEP patients before treatment                  | FEP patients after 0.6-year treatment         | FEP patients after 5.1-year treatment         |                                     |                                     |
|                          | Effects of Independent Variables on the Dependent Variable ( <i>F</i> -Value, <i>p</i> -Value) |                                     |                                                   |                                      |                                                |                                               |                                               |                                     |                                     |
|                          | <i>t</i> -Value, <i>p</i> -Value                                                               |                                     |                                                   |                                      |                                                |                                               |                                               |                                     |                                     |
| Acylcarnitines           |                                                                                                |                                     |                                                   |                                      |                                                |                                               |                                               |                                     |                                     |
| C5                       | $F_{(1,109)} = 91.05$ ,<br>$p < 1 \times 10^{-4}$                                              | $F_{(1,74)} = 1.76$ ,<br>$p = 0.19$ | $F_{(1,109)} = 12.03$ ,<br>$p = 8 \times 10^{-4}$ | $F_{(2,74)} = 0.86$ ,<br>$p = 0.43$  | $F_{(3,74)} = 8.24$ , $p = 1 \times 10^{-4}$   |                                               |                                               | $F_{(1,74)} = 0.46$ ,<br>$p = 0.50$ | $F_{(1,74)} = 0.02$ ,<br>$p = 0.89$ |
|                          |                                                                                                |                                     |                                                   |                                      | $t_{(74)} = -2.86$ ,<br>$p = 6 \times 10^{-3}$ | $t_{(74)} = 0.29$ ,<br>$p = 0.77$             | $t_{(74)} = 1.39$ ,<br>$p = 0.17$             |                                     |                                     |
| C5-M-DC                  | $F_{(1,109)} = 4.36$ ,<br>$p = 0.04$                                                           | $F_{(1,74)} = 0.99$ ,<br>$p = 0.32$ | $F_{(1,109)} = 0.02$ ,<br>$p = 0.90$              | $F_{(2,74)} = 1.18$ ,<br>$p = 0.31$  | $F_{(3,74)} = 3.69$ , $p = 0.02$               |                                               |                                               | $F_{(1,74)} = 1.46$ ,<br>$p = 0.23$ | $F_{(1,74)} = 0.16$ ,<br>$p = 0.69$ |
|                          |                                                                                                |                                     |                                                   |                                      | $t_{(74)} = 3.23$ ,<br>$p = 2 \times 10^{-3}$  | $t_{(74)} = 3.04$ ,<br>$p = 3 \times 10^{-3}$ | $t_{(74)} = 1.54$ ,<br>$p = 0.13$             |                                     |                                     |
| C5:1                     | $F_{(1,109)} = 0.75$ ,<br>$p = 0.39$                                                           | $F_{(1,74)} = 2.49$ ,<br>$p = 0.12$ | $F_{(1,109)} = 0.18$ ,<br>$p = 0.67$              | $F_{(2,74)} = 0.001$ ,<br>$p = 0.99$ | $F_{(3,74)} = 8.11$ , $p = 1 \times 10^{-4}$   |                                               |                                               | $F_{(1,74)} = 0.11$ ,<br>$p = 0.74$ | $F_{(1,74)} = 0.18$ ,<br>$p = 0.67$ |
|                          |                                                                                                |                                     |                                                   |                                      | $t_{(74)} = 4.06$ ,<br>$p = 1 \times 10^{-4}$  | $t_{(74)} = 3.70$ ,<br>$p = 4 \times 10^{-4}$ | $t_{(74)} = 4.46$ ,<br>$p < 1 \times 10^{-4}$ |                                     |                                     |
| C5:1-DC                  | $F_{(1,109)} = 7.65$ ,<br>$p = 7 \times 10^{-3}$                                               | $F_{(1,74)} = 0.05$ ,<br>$p = 0.82$ | $F_{(1,109)} = 0.25$ ,<br>$p = 0.62$              | $F_{(2,74)} = 2.63$ ,<br>$p = 0.08$  | $F_{(3,74)} = 5.19$ , $p = 3 \times 10^{-3}$   |                                               |                                               | $F_{(1,74)} = 0.04$ ,<br>$p = 0.83$ | $F_{(1,74)} = 0.36$ ,<br>$p = 0.55$ |
|                          |                                                                                                |                                     |                                                   |                                      | $t_{(74)} = 3.53$ ,<br>$p = 7 \times 10^{-4}$  | $t_{(74)} = 3.52$ ,<br>$p = 8 \times 10^{-4}$ | $t_{(74)} = 3.14$ ,<br>$p = 2 \times 10^{-3}$ |                                     |                                     |
| Hexoses                  |                                                                                                |                                     |                                                   |                                      |                                                |                                               |                                               |                                     |                                     |
| Hexoses                  | $F_{(1,109)} = 10690$ ,<br>$p < 1 \times 10^{-4}$                                              | $F_{(1,73)} = 0.43$ ,<br>$p = 0.51$ | $F_{(1,109)} = 5.81$ ,<br>$p = 0.02$              | $F_{(2,73)} = 0.35$ ,<br>$p = 0.71$  | $F_{(3,73)} = 4.44$ , $p = 6 \times 10^{-3}$   |                                               |                                               | $F_{(1,73)} = 5.33$ ,<br>$p = 0.02$ | $F_{(1,73)} = 2.58$ ,<br>$p = 0.11$ |
|                          |                                                                                                |                                     |                                                   |                                      | $t_{(73)} = 0.60$ ,<br>$p = 0.55$              | $t_{(73)} = 0.48$ ,<br>$p = 0.63$             | $t_{(73)} = 3.40$ ,<br>$p = 1 \times 10^{-3}$ |                                     |                                     |
| Ratios of acylcarnitines |                                                                                                |                                     |                                                   |                                      |                                                |                                               |                                               |                                     |                                     |
| (C16+C18)/C0             | $F_{(1,103)} = 1737$ ,<br>$p < 1 \times 10^{-4}$                                               | $F_{(1,73)} = 0.06$ ,<br>$p = 0.81$ | $F_{(1,103)} = 3.93$ ,<br>$p = 0.05$              | $F_{(2,73)} = 1.88$ ,<br>$p = 0.16$  | $F_{(3,73)} = 4.64$ , $p = 5 \times 10^{-3}$   |                                               |                                               | $F_{(1,73)} = 1.53$ ,<br>$p = 0.22$ | $F_{(1,73)} = 1.17$ ,<br>$p = 0.28$ |
|                          |                                                                                                |                                     |                                                   |                                      | $t_{(73)} = 3.43$ ,<br>$p = 1 \times 10^{-3}$  | $t_{(73)} = 0.73$ ,<br>$p = 0.47$             | $t_{(73)} = 1.85$ ,<br>$p = 0.07$             |                                     |                                     |
| (C16+C18:1)/C2           | $F_{(1,89)} = 224.7$ ,<br>$p < 1 \times 10^{-4}$                                               | $F_{(1,71)} = 5.96$ ,<br>$p = 0.02$ | $F_{(1,89)} = 5.22$ ,<br>$p = 0.02$               | $F_{(2,71)} = 3.33$ ,<br>$p = 0.04$  | $F_{(3,71)} = 20.81$ , $p < 1 \times 10^{-4}$  |                                               |                                               | $F_{(1,71)} = 0.71$ ,<br>$p = 0.40$ | $F_{(1,71)} = 0.29$ ,<br>$p = 0.59$ |
|                          |                                                                                                |                                     |                                                   |                                      | $t_{(71)} = 4.18$ ,<br>$p = 1 \times 10^{-4}$  | $t_{(71)} = 0.72$ ,<br>$p = 0.47$             | $t_{(71)} = -2.56$ ,<br>$p = 0.01$            |                                     |                                     |
| (C2+C3+C4+C5)/C0         | $F_{(1,108)} = 50.42$ ,<br>$p < 1 \times 10^{-4}$                                              | $F_{(1,68)} = 5.13$ ,<br>$p = 0.03$ | $F_{(1,108)} = 6.64$ ,<br>$p = 0.01$              | $F_{(2,68)} = 2.34$ ,<br>$p = 0.10$  | $F_{(3,68)} = 10.36$ , $p < 1 \times 10^{-4}$  |                                               |                                               | $F_{(1,68)} = 0.14$ ,<br>$p = 0.71$ | $F_{(1,68)} = 0.72$ ,<br>$p = 0.40$ |
|                          |                                                                                                |                                     |                                                   |                                      | $t_{(68)} = -2.81$ ,<br>$p = 6 \times 10^{-3}$ | $t_{(68)} = -1.95$ ,<br>$p = 0.05$            | $t_{(68)} = 3.00$ ,<br>$p = 4 \times 10^{-3}$ |                                     |                                     |
